# Supplementary material
Source: PubMed Central journal article supplement (PMC4935698)
Supplement: mmc1.pdf [file mmc1.pdf]

**Cell, Volume 165**

**Supplemental Information**

**Dynamics of Translation of  
Single mRNA Molecules In Vivo**

**Xiaowei Yan, Tim A. Hoek, Ronald D. Vale, and Marvin E. Tanenbaum**

## Extended Experimental Procedures

### General considerations for quantifying translation based on scFv-GFP fluorescence intensity values

In this study, we provide estimates for the number of ribosomes per mRNA, reveal ribosome initiation and translocation rates and provide measurements of ribosome stalling. All these values were calculated based on fluorescence intensities of the scFv-GFP antibody bound to nascent polypeptides. It is important to note that such fluorescence intensities by themselves do not provide quantitative information, but only can be interpreted after taking several factors into consideration.

#### 1) Ribosome position along the mRNA.

Ribosome position along the mRNA affects the number of SunTag peptides that have been synthesized, and thus the amount of scFv-GFP fluorescence associated with that ribosome/nascent polypeptide. We have generated a mathematical model to correct for this effect (see the section “Modeling of the fluorescence intensity of translation sites” below, and Figure S7). It is important to note that this model assumes a homogeneous distribution of ribosomes along the mRNA which is likely accurate when averaging many mRNAs, but stochastic distributions can occur on an individual mRNA molecule. Also, non-homogenous distribution of ribosomes will not bias the estimate of ribosome number in ensemble statistics, as it is equally likely to underestimate or to overestimate ribosome number.

#### 2) Variability in the number of scFv-GFPs bound to a SunTag peptide array.

The fluorescence intensity of a nascent polypeptide depends on the number of scFv-GFP molecules bound. The number of scFv-GFP antibody molecules bound to a single SunTag polypeptide can, however, vary. This variation may be limited though, as binding of the scFv-GFP to the 24 peptide SunTag array appears to saturate when sufficient cytoplasmic scFv-GFP is present, resulting in the binding of close to 24 scFv-GFPs per SunTag<sub>24x</sub> array (Tanenbaum et al., 2014). Variation in the number of scFv-GFPs per SunTag<sub>24x</sub> array will not affect the calculation

of the number of ribosomes per mRNA, as this variation will occur on both the nascent polypeptides and the fully synthesized and released SunTag protein in the same cells which is used to normalize the fluorescence intensity of the translation sites. However, when a lot of SunTag<sub>24x</sub> molecules have been synthesized and released into the cytoplasm, they can sequester the free scFv-GFP, leaving insufficient free scFv-GFP to bind all newly synthesized nascent SunTag peptides. Indeed, we have observed that at high expression levels of the reporter, translation sites become progressively dimmer after several hours, indicative of cytoplasmic depletion of the scFv-GFP. While such depletion of cytoplasmic scFv results both in dimmer translation sites and dimmer fully synthesized SunTag protein (used for normalization), and therefore does not affect our calculations of ribosome number per mRNA. Nonetheless, to circumvent this issue, we have used an inducible promoter to initiate reporter expression only ~1 hr before image acquisition. An additional source of variability in scFv-GFP binding to the SunTag peptides is introduced by the lag time that exists between synthesis of a new SunTag peptide and binding to the scFv-GFP. However, our experiments show that this lag time likely does not substantially decrease overall fluorescence intensity of the translation site, indicating that the binding reaction is relatively fast. This lag time likely depends on the level of free cytoplasmic scFv-GFP, and could therefore vary under different conditions.

### 3) Fluorescence decay of the scFv-GFP signal at translation sites.

In several experiments, including cases of natural translation shutdown and harringtonine ribosome run-off experiments, we observed a reduction in scFv-GFP fluorescence intensity at translation sites. We generally interpret this fluorescence decay as ribosomes terminating translation at the stop codon, which results in nascent chain release and ribosome recycling. While this conclusion is likely valid in most cases, alternative explanations are possible. For example, ribosomes stall for extended periods of time on mRNAs with chemical damage or on the Xbp1 nucleotide pausing sequence, but eventually scFv-GFP signal associated with stalled translation sites does decrease. While it is possible that ribosomes eventually normally read through such stall sequences and terminate normally at a stop codon, it is also possible that ribosomes are removed from mRNAs after a prolonged stalling event. Additional experiments

are required to distinguish these events, for example by placing the stall-inducing sequence upstream of the SunTag peptide array.

#### 4) Photobleaching

Photobleaching rates were determined by measuring the total GFP signal of the entire cell over time. In experiments where photobleaching resulted in a fluorescence decrease of >10% of the initial fluorescence intensity, fluorescence intensities of translation sites were corrected for photobleaching.

#### **Calculation of Ribosome Elongation**

Ribosome elongation rates were determined by three different methods.

##### *Population measurements from harringtonine ribosome run-off (Related to Figure 2)*

The linear phase of the decrease in GFP fluorescence after new ribosome translation is prevented by addition of harringtonine provides information on the rate of ribosome movement along the mRNA. A model for the fluorescence signal is provided below (See Modeling of the fluorescence intensity of translation sites) along with details of how the data was fit to determine the elongation rate.

##### *Calculating the ribosome elongation rate based on single mRNA run-off times (Related to figure S2E)*

The total time required for run-off of all ribosomes from individual mRNAs represents the time until the last (*i.e.* most 5') ribosome completes translation after harringtonine treatment. Individual translation site intensities were quantified using the spot\_counter ImageJ plugin (<http://fiji.sc/SpotCounter>) developed by Nico Stuurman, which draws a box around the selected translation site and scores the number of time-points that the translation site was detected. Automatic tracking was manually curated for all spots to ensure high quality tracking data. The average run-off time for all mRNAs was then determined, and we subtracted 60 s from this time, the time required for harringtonine to enter the cell (Ingolia et al., 2011). We

then divided the reporter length (1462 codons for the SunTag<sub>24x</sub>-Kif18b-PP7<sub>24x</sub> reporter) by the corrected run-off time to obtain the ribosome elongation rate. This rate assumes that the final ribosome loaded near the 5' end of the mRNA, which may not be true for all mRNAs. This assumption may slightly overestimate ribosome elongation rates, as the actual distance covered by the most 5' ribosome covers until completion of translation will be slightly less than 1462 codons, if it is downstream of the start codon at the time of harringtonine addition. However, considering that most mRNAs have ~20 ribosomes and the average inter-ribosomal distance is therefore ~70 codons, the most 5' ribosome will usually be within 70 codons of the start site, which represents a 5% error.

*Determining the ribosome elongation rate from single ribosome tracking data (Related to Figure 7).*

By limiting translation initiation using the Emi1 5'UTR<sub>long</sub> fused to the translation reporter, individual ribosomes could be observed decoding an mRNA molecule. For each single ribosome translation event, we measured the duration of the event, by determining the first time-point that GFP could reliably be detected over the background until the GFP signal disappeared. Only tracks were included that lasted less than 12 min. However, determining ribosome elongation rate based on such measurements was non-trivial, as this requires knowledge of the precise position of the ribosome along the transcript when the nascent chain signal is first detected; presumably a number of SunTag peptides need to have been synthesized before sufficient signal has accumulated to allow detection. We therefore needed to identify the fluorescence intensity detection limit. To accomplish this, we first determined the maximal fluorescence intensity associated with a single ribosomes; this occurs when the entire SunTag peptide array has been synthesized (Figure 7C). Maximal intensity was calculated by aligning all of the traces (n = 44) at the last time point in which fluorescence was observed and averaging the fluorescence intensity of the last 3 time points before polypeptide dissociation. We then aligned all 44 traces at the first point we could visually detect fluorescence and found that we could reliably detect signal from single ribosomes when their nascent chain-associated fluorescence was ~1/3 of the maximal intensity (Figure 7B). From this, we infer that ~8 of the 24

SunTag peptides likely have been synthesized at this point in time, which places these ribosomes on codon 245 (taking into account that SunTag peptides will not be labeled when inside the ribosome exit tunnel). Therefore, from the time of first fluorescence measurement to the release of the completed polypeptide on the stop codon (406 s on average for  $n = 44$  individual ribosome translocations), the ribosome moves  $1462 - 245 = 1217$  codons (since the whole transcript is 1462 codons long). The ribosome elongation rate can be calculated as the number of codons / time:  $1217/406 = 3.0$  codons/s.

### **Translation Initiation Rate**

#### *Estimation of steady state initiation rate*

To maintain a constant ribosome occupancy, the rate of removal of ribosomes from the mRNA molecule after completion of translation, must be balanced by new ribosome loading on the mRNA through translation initiation. To estimate the translation initiation rate, we first calculated the average inter-ribosomal distance, which is 58-146 codons assuming a ribosome number per mRNA of 10-25 ribosomes on the SunTag<sub>24x</sub>-Kif18b reporter. Considering the ribosome elongation rate of 3.5 codons/s (for the Kif18b reporter), a ribosome will complete translation on average every  $58/3.5$  to  $146/3.5 = 17$  to 42 s. Thus, if constant ribosome occupancy is maintained, the initiation rate must be between  $1/17 \text{ s}^{-1}$  to  $1/42 \text{ s}^{-1}$  or 1.4 to 3.6  $\text{min}^{-1}$ . These values represent average initiation rates, as the initiation rate on single mRNA molecules will vary over time.

#### *Comparing the translation initiation rate on newly transcribed versus polysomal mRNAs.*

Through the experiments in which single translating ribosomes were tracked, we determined that ribosomes could be first detected when  $\sim 1/3$  of SunTag peptides had been synthesized (when the ribosome is positioned around codon 245 (see above)). Thus, when the first, pioneer ribosome was detected on a newly transcribed mRNA molecule, it was likely near this position. After initial fluorescence detection of the pioneer ribosome, translation site signal increased continuously for several min (Figure 4B). This fluorescence increase was presumably both due to the increase in the number of synthesized SunTag peptides on the pioneer ribosome, as well

as due to additional ribosomes that initiated after the pioneer ribosome. The translation site fluorescence intensity reached a steady state ~6 min after the initial detection of fluorescence (Figure 4B), indicating that the ribosome density remained constant from that point on. At a translocation rate of 3-3.5 codons/s, it would take the pioneer ribosome ~6 min to reach the stop codon from the position of initial detection (codon 245). From these calculations, we conclude that the ribosome density on the mRNA has already reached its maximal value as soon as the pioneer ribosome completes translation. Since ribosome density is a function of ribosome initiation rate and elongation rate, we infer that the initiation rate on the newly transcribed mRNA must be identical to that on mRNAs with established polysomes, assuming that the elongation rates are on average similar.

### **Estimation of Ribosome Number per mRNA**

To obtain the number of ribosomes per mRNA molecule, we set up a normalization experiment to compare the average intensity of the single translation sites with the intensity coming from single, fully synthesized SunTag<sub>24x</sub>-Kif18b proteins (Figure S2A). As the fully synthesized SunTag-Kif18b proteins encompass 24 copies of the SunTag peptide, their intensity should be comparable with the fluorescence intensity associated with a ribosome at the 3' end on the mRNA. However, the ribosomes at the 5' end of the mRNA will be much dimmer because they have not fully synthesized the SunTag epitopes. Thus, dividing the translation site intensity by the intensity from a single fully synthesized SunTag-Kif18b protein will underestimate the actual number of ribosomes on an mRNA. A correction factor derived from our model presented below was used to obtain a more accurate estimate of ribosome number.

### **Modeling of the fluorescence intensity of translation sites**

Every active translation site is composed of one single mRNA with multiple ribosomes undergoing translation. The SunTag peptides produced from ribosomes are bound by scFv-GFP antibodies floating in the cytoplasm, giving rise to a fluorescence signal from the translation complex. Ribosomes on the 5' end of the mRNA are still translating part of the SunTag peptide, thus resulting in a partial fluorescence signal from the emerging polypeptide chain, while

ribosomes that are translocating on the 3' end of the gene have already synthesized the entire SunTag peptide array and are fully covered by the antibodies. Therefore, to interpret intensity changes from a transcript loaded with multiple ribosomes, we have generated a model that takes into account ribosome location as well as density on the mRNA as a function of time.

The intensity from a single ribosome will increase gradually as the ribosome moves towards the 3' end until it reaches a plateau where all SunTag peptides are synthesized (Figure S7A). This relationship is described as following:

$$f(x) = \begin{cases} g(x) & x \in [0, L_1) \\ I_{sun} & x \in [L_1, L] \end{cases} \dots\dots\dots (1)$$

The parenthesis and square bracket are notations for intervals. The two numbers are the endpoints of the interval. Parenthesis indicates exclusion of corresponding endpoint while square bracket indicates inclusion of it.

$f(x)$  : intensity from a single ribosome at position  $x$

$g(x)$  : intensity from a single ribosome at position  $x$  when  $x$  is in between 0 and  $L_1$ , simplified as a linear function in the diagram in Figure S7A

$x$  : ribosome position on the mRNA at time  $t$

$L$  : the length of positions that can be covered by ribosomes, which includes the open reading frame decoding both the SunTag peptides and the gene of interest (GOI), as shown in Figure S7A

$L_1$  : position on the transcript where intensity from a ribosome at that position reaches plateau intensity, as shown in Figure S7A

$I_{sun}$  : the intensity of a single SunTag array that is fully covered by scFv-GFP, with the intensity depending on the number of SunTag peptides fused to the gene of interest, multiplied by the intensity of a single scFv-GFP antibody

$$I_{sun} = n_{sun} \times i_{GFP} \dots\dots\dots (2)$$

$n_{sun}$  : the number of SunTag peptides which are fused to the gene of interest (mostly 24 in this study)

$i_{GFP}$  : the intensity of a single scFv-GFP



Thus the average intensity from a single translation site could therefore be described using the following formula:

$$F(t) = \int_0^L f(x) \cdot R(x, t) \cdot dx \dots\dots\dots (3)$$

$F(t)$  : average fluorescence intensity from a single translation site at time  $t$

$R(x, t)$  : ribosome probability density at position  $x$  at time  $t$ .

With the assumption that ribosomes are randomly positioned in a population of transcripts (while this distribution may not be homogeneous on a single mRNA, it will approximate a random distribution when averaging hundreds of mRNAs, as is done in these experiments; thus this model is only accurate when a large number of mRNAs is analyzed), the probability density will be the same at different positions on the transcript at steady state (Figure S7B, left), which leads to:

$$R(x, t) = R_s$$

$$R_s = \frac{n_r}{L_r} \dots\dots\dots (4)$$

$R_s$  : ribosome density during steady state

$n_r$  : the number of ribosomes on a single transcript

$L_r$  : the length of transcript that is covered by the ribosomes

**Modeling of shutdown process and elongation rate**

Based on the above, we are able to model fluorescence intensity as a function of time. We use the translation shutdown process as an example:

When new ribosomes are no longer added at the 5' end (*e.g.* when initiation is blocked by harringtonine), previously bound ribosomes will run off the transcript from the 5' to the 3' end. This will change the ribosome distribution as a function of time  $t$ , as described by the following equations and the illustration depicted in Figure S7B:

$$R(x, t) = \begin{cases} 0 & x \in [0, v_e \cdot t) \\ R_s & x \in [v_e \cdot t, L] \end{cases}$$

..... (5)

$v_e$  : elongation rate; assumed to be a constant in the model.

If we incorporate this function into equation (3), we derive the following formula, which describes the change in intensity of a single translation site as a function of time ( $t = 0$  marking the beginning of harringtonine treatment) (Figure S7C).

$$F(t) = \begin{cases} R_s \cdot \left[ \int_{v_e t}^{L_1} g(x) \cdot dx + I_{sun}(L - L_1) \right] & t \in \left[ 0, \frac{L_1}{v_e} \right) \quad 1) \\ R_s \cdot I_{sun}(L - v_e \cdot t) & t \in \left[ \frac{L_1}{v_e}, \frac{L}{v_e} \right) \quad 2) \\ 0 & t \in \left[ \frac{L}{v_e}, \infty \right) \quad 3) \end{cases} \quad \text{..... (6)}$$

This formula describes absolute intensity, which is dependent on many variables including the laser power used to excite the fluorophore. Therefore, we normalize this equation to the initial steady state fluorescence using the constant  $C_1$ :

$$F_s = R_s \cdot \left[ \int_0^{L_1} g(x) \cdot dx + I_{sun}(L - L_1) \right] = R_s \cdot C_1 \quad \text{..... (7)}$$

$$F_n(t) = \frac{F(t)}{F_s} = \begin{cases} \left[ \int_{v_e t}^{L_1} g(x) \cdot dx + I_{sun}(L - L_1) \right] / C_1 & t \in \left[ 0, \frac{L_1}{v_e} \right) \quad 1) \\ I_{sun}(L - v_e \cdot t) / C_1 & t \in \left[ \frac{L_1}{v_e}, \frac{L}{v_e} \right) \quad 2) \\ 0 & t \in \left[ \frac{L}{v_e}, \infty \right) \quad 3) \end{cases} \quad \text{..... (8)}$$

$F_s$ : translation site intensity during steady state

$C_1$  : constant number,  $C_1 = \int_0^{L_1} g(x) \cdot dx + I_{sun}(L - L_1)$

To further simplify the model, a linear function was used to describe  $g(x)$ , and the results are shown in Figure S7D. Data acquired in real experiments have stalling events, which complicates fitting the data to the simulated results. To simplify the determination of the elongation rate from the harringtonine run-off experiments, we only fit the second stage of the curve (Figure S7C), which is given by:

$$F_n(t) = F(t)/F_s = I_{sun}(L - v_e \cdot t)/C_1 = -\frac{1}{C} \cdot v_e \cdot t + \frac{L}{C} \quad \dots\dots\dots (9)$$

$C$  : constant number,  $C = C_1/I_{sun}$

The first order derivative of this stage will give us the elongation rate  $v_e$ :

$$\frac{dF_n(t)}{dt} = -\frac{1}{C} \cdot v_e \quad \dots\dots\dots (10)$$

Intensity from stalled or slowly elongating translation sites contributes about 10-20% of the initial fluorescence intensity (Figure 2D), which will lead to underestimation of the slope without correction. To overcome this, a linear regression was fit to the second half of the curve after initial run-off, and the intercept value was subtracted to exclude the influence of stalled translation sites. The curve was normalized after correction, and relative fluorescence intensity in between 40-80% was fit with a linear function to extract the slope. Elongation rate was calculated using the formula mentioned above. However, several more corrections were applied to the previous equation to account for the influence of 1) the codons translated before the SunTag array (23 aa) as well as the codons in between the SunTag array and the GOI (6 aa) 2) the nascent peptide buried in the ribosome exit tunnel (36 aa was used).

**Modeling of the number of ribosomes on a single mRNA**

Fully synthesized SunTag<sub>24x</sub>-Kif18b proteins encompass 24 copies of the SunTag peptide, so their intensity should be comparable to the fluorescence intensity of a ribosome at the 3' end of the mRNA. However, ribosomes at the 5' end of the mRNA will be dimmer, since they have not fully synthesized the SunTag epitopes. Thus, dividing the translation site intensity by the intensity of a single fully synthesized SunTag<sub>24x</sub>-Kif18b protein will underestimate the actual number of ribosomes on an mRNA.

To overcome this, a correction factor  $\gamma$  was applied. As described earlier in equation (4), ribosome density  $R_s$  is:

$$R_s = \frac{n_r}{L_r}$$

If we assume the transcript is fully covered by the ribosomes during steady state, the ribosome number  $n_r$  can be derived as:

$$n_r = R_s \cdot L_r = R_s \cdot L = \frac{(F_s \cdot L)}{C_1} = \gamma \cdot F_s / I_{sun} \dots\dots\dots (11)$$

The constant  $\gamma = 2L / (2L - L_1)$  when a linear function was used to describe  $g(x)$ . As discussed in the previous section, more corrections were applied to the equation to account for influence of things such as ribosome exit tunnel length. Thus, the actual correction factor used for the Kif18b reporter is 1.32 (1/0.76).

## Plasmid sequences

### SunTag<sub>24x</sub>-Kif18b-PP7<sub>24x</sub> - Complete plasmid sequence

gacggatcgggagatctccgatcccctatgggtgactctcagtacaatctgctctgatccgcataagccaagcagatctgctccctgcttgtgtgttg  
gaggtcgtgtagtagtgcgagcaaaaattaaagctacaacaaggcaaggcttgaccgacaattgcatgaagaatctgcttagggtaggcgttttgc  
gctgcttcgcatgtacggccagatatacgcgttgacattgattattgactagttattaatagtaataacacggggtcattagttcatagcccata  
tggagttccgcttacataacttacggtaaatggcccgcctggctgaccgccaacgaccccccccattgacgtcaataatgacgtatgtcccatag  
taacccaatagggactttccattgacgtcaatgggtggagtatttacggtaaaactgcccactggcagtcacatcaagtgtatcatatgccaagtacgc  
cccctattgacgtcaatgacggtaaatggcccgcctggcattatgcccagtcacatgacctatgggactttcctactggcagtcacatctcgtattagtc  
atcgctattaccatggtgatgcggttttggcagtcacatcaatgggctggatagcgggttgactcacggggattccaagtctccacccattgacgtca  
GCTCAGCTTTCTAGACCGCGcgaatgggcggtaggcgtgtacgggtggaggtctatataagcagagctctccctatcagtgatagagatc  
tcctatcagtgatagagatcgtcgacgagctcgtttagtgaaccgtcagatcgctggagacgcatccacgctgtttgacctcatagaagacacc  
gggaccgatccagcctccgactctagcgtttaaacttAAGCTTGCCACCATGGGCGCCATCATAACGCGGCCGAATCATcggt  
ccgGGTGGATCTGGAGGTGGAGGTTCTGGAGGAGAAGAAGCTTTTGGCAAGAATTATCATCTTGAGAACGAAGTG  
GCTCGTCTTAAGAAAGGTTCTGGCAGTGGAGAAGAAGCTTTTCAAAGAATTACCACCTGGAAAATGAGGTAGCT  
AGACTGAAAAAGGGGAGCGGAAGTGGGAGGAGTTGCTGAGCAAAAATTATCATTGGAGAACGAAGTAGCAC  
GACTAAAGAAAGGGTCCGGATCGGGTGGAGGTTACTCTCGAAAAATTATCATCTCGAAAACGAAGTGGCTCGGC  
TAAAAAGGGCAGTGGTTCTGGAGAAGAGCTATTATCTAAAAACTACCACCTCGAAAATGAGGTGGCAGCTTAA  
AAAAGGGAAGTGGCAGTGGTGAAGAGCTACTATCCAAGAATTATCATCTTGAGAACGAGGTAGCGCGTTTGAAG  
AAGGTTCCGGCTCAGGAGAGGAAGTCTCTCGAAGAAGTATCATCTTGAAAATGAGGTGCTCGATTAAGAAAG  
GGATCGGGCAGTGGTGAAGAACTACTTTCAAAGAATTACCACCTCGAAAACGAAGTAGCTCGATTAAGAAAGGT  
TCAGGGTCCGGTGAAGAATTACTGAGTAAAAATTATCATCTGGAAAATGAGGTAGCGAGACTAAAAAAGGGGAG  
TGTTCTGGCGAAGAGTTGCTATCGAAAATTATCATCTTGAGAACGAAGTTGCTAGGCTCAAAAAGGGCTCAGG  
CTCAGGCGAGGAGTTGCTCTCGAAAAGTACCACCTGGAAAATGAGGTGCGGAGGTTGAAAAGGGGAGCGGGT  
CGGGCAGGAGTATTGAGCAAAAATTATCATTAGAGAACGAAGTCCGCGCTTAAGAAAGGCTCGGGCTCG  
GGCGAAGAAGTCTTATCGAAGAAGTACCACCTCGAAAATGAGGTGCGCAGGTTGAAAAGGGCAGTGGCAGCGG  
GGAGGAAGTCTTGAAGCAAGAAGTACCACCTGGAGAATGAGGTGCGGAGATTGAAGAAAGGGTCCGGGAGCGGC  
GAGGAATTGCTCAGCAAGAATTATCATTGGAGAACGAAGTCCGAGGCTCAAGAAAGGCTCGGGGTCGGGGGA  
GGAATTGTTGAGTAAAAACTACCACCTGGAAAATGAAGTCCGAGGCTCAAAAAGGGAGTGGGAGCGGCGAAG  
AGTTATTGAGCAAAAATTACCACCTGGAGAACGAAGTGGCAAGGCTCAAGAAAGGGAGCGGCAGCGGGGAGGA  
GCTCTTATCGAAGAAGTACCACCTAGAGAATGAAGTCCCGCTTGAAGAAAGGCTCGGGGAGCGGGGAAGAGC  
TCTTGAAGCAAGAAGTACCACCTGGAAAATGAGGTGGCGGCTTGAAGAAAGGGAGCGGGAGCGGGGAAGAGTT  
ACTATCTAAGAATTATCATCTCGAGAACGAGGTGGCTCGACTAAAGAAGGCTCCGGCAGTGGGAGGAAGTCTC  
GTCGAAGAAGTATCATCTGAAAATGAGGTTGCAAGACTTAAAAAGGGTCCGGATCAGGTGAGGAAGTACTCAG  
TAAGAATTACCACCTGGAAAACGAAGTGCACGTTTGAAGAAAGGATCAGGATCAGGCGAAGAAGTCTCTCAA  
AGATTATCATTGGAAAATGAGGTTGCACGTTTAAAAAGGGAAAGTGGCAGTGGTGAAGAAAGTCTGTGAAAAA  
TTATCATCTCGAGAATGAAGTAGCCGACTTAAAAAGGGTCTGGCTCGGGTCAAGCGCCGACCGGTGAGCAGT  
GGAGGACAGCAGCTGCAAGTAGTGGTACGGGTGCGGCCCCCACCCTCGGGAGCTGGACAGTCAAGCGGCGGC  
CAGTGGTTCAGGTGGTGGACGAGCGGGTGTGGTGTAAACCCTGAGGAGCCCGATGGAGGGTTCCCTGGCCTG  
AAATGGGGTGGCACCCATGATGGCCCCAAGAAGAAGGGCAAGACCTGACGTTTGTCTTTGACCGGGTCTTTGGC  
GAGGCGGCCACCCAACAGGACGTGTTCCAGCACACCACGCACAGCGTCTGGACAGCTTCTCCAGGGCTACAAC  
TGCTCAGTGTTCCTACGGGGCCACCGGGGCTGGGAAGACACACACCATGCTGGGAAGGGAGGGGGACCCCG  
GCATCATGTACCTGACCACCGTGGAACTGTACAGGCGCCTGGAGGCCCGCCAGCAGGAGAAGCACTTCGAGGTG  
CTCATCAGCTACCAGGAGGTGATAATGAACAGATCCATGACCTCCTGGAGCCCAAGGGGCCCTTGCATCCGC  
GAGGACCCCGACAAGGGGGTGGTGGTGAAGGACTTTCTTTCCACCAGCCAGCCTCAGCCGAGCAGCTGCTGGA  
GATACTGACCAGGGGGAACCGTAACCGCACGCAGCACCCCACTGATGCCAACGCGACTTCTCCCGCTCCCATGCC

ATCTTCAGATCTTTGTGAAGCAGCAGGACCGGGTTCAGGACTGACCCAGGCTGTCCAGGTGGCCAAGATGAGC  
CTGATTGACCTGGCTGGCTCAGAGCGGGCATCCAGCACCCATGCGAAGGGGGAGCGGCTGCGGGAGGGGGCCA  
ACATCAACCGCTCTCTGCTGGCGCTCATCAACGTCTCAATGCCTTGCCGATGCAAAGGGCCGAAGACCGCTGT  
GCCCTACGCGGACAGCGCACTGACCCGCTGCTCAAAGACTCCCTCGGGGGCAACTGCCGCACAGTGATGATCGC  
TGCCATCAGCCCCTCCAGCCTGACCTACGAGGACACGTATAATACCCTCAAATATGCCGACCGGGCCAAGGAGATC  
AGGCTCTCGCTGAAGAGCAATGTGACCAGCCTGGACTGTACATCAGCCAGTATGCTACCATCTGCCAACAGCTCC  
AGGCTGAGGTAGCCGCTCTGAGGAAGAAGCTCCAAGTGTATGAGGGGGGAGGCCAGCCCCACCACAGGACCTC  
CCAGGATCTCCAAGTCGGGACCACCACCAGAACACCTTCCAGCTCCCCCTTGCCACCCCACCCTCCAGCCAGCC  
CTGCACCCAGAGCTCCCTGCAGGGCCTAGAGCCCTTCAAGAGGAGAGTCTGGGGATGGAGGCCAGGTGGAGA  
GGGCCATGGAAGGGAACCTTTCAGACCAGGAGCAGTCCCCAGAGGATGAGGATGAAGGCCAGCTGAGGAGGT  
TCCAACCCAGATGCCAGAGCAGAACCCACACATGCACTGCCAGAGTCCCCTCGCCTGACCCTGCAGCCCAAGCCA  
GTCGTGGGCCACTTCTCAGCACGGGAACCTGGATGGGGACCGTTCTAAGCGGTTGGCCCTAAAGGTGCTGTGCGTT  
GCCCAGCGGCAGTACTCCCTGCTCCAAGCAGCCAACCTCCTGACGCCCCGACATGATCACAGAGTTTGAGACCCTAC  
AGCAGCTGGTGAAGAGGAAAAAATTGAGCCTGGGGCAGAGGCCTTGAGGACTTCAGGCCTGGCCAGGGGGGC  
ACCTCTGGCTCAGGAGCTGTGTTTCAGAGTCAAAGCCTCCAGGATACACTGGCCCTGTGACCCGGACTATGGCGAG  
GCGACTGAGTGGCCCCCTGCACACCCTGGGAATCCCGCCTGGACCCAACCTGCACCCAGCCCAGGGGTCCCGATG  
GCCCATGGAGAAGAAGAGGAGGAGACCAAGCGCCTTGAGGCAGACAGTCCCATGGCCCCAAAGCGGGGCACC  
AAGCGCCAGCGCCAGTCTTCTGCCCTGCCTAAGGAGAGGGTCTCTGCCTGACACCCAACCTTACAGGGGCCCA  
GCACCCCAAAGGAGAAAGGGCCTCCTCCCCCTGCCATTCCCCTCGCGTTTGCCAGCCACAGTCATCAAAGCCG  
GGTGCCCTGGGCCCTTCGCCATGCAGAAGTCTCCACCCGCTGGCTCTGCCACTCGAGACCTCAATGCCACC  
TTTGATCTCTGAGGAGCCTCCCTCAAAGCCCAGTTTCCATGAATGCATTGGCTGGGACAAAATACCCAGGAGC  
TGAGCAGGCTGGACCAGCCCTTATCCCCAGGGCACCTGTGCCCTGTTACCATGAAGGGCCCCAAGCCAACATC  
TCCCTCCCTGGGACCTCTGCCTGCAAGAAGAAGCGCGTTGCGAGTTCCTCAGTCTCCATGGCCGCAGCCGCATC  
GCCCCCTCCCCAGCAGCACTTTGAAGAGGCCAGCTGGGCCCTTGTACTCCCAGAGCTGCCCTTGAGTCCCCTGT  
GCCCTAGCAACCGGAGGAATGGAAAGGACCTCATCAGGGTGGGGAGAGCACTCTCAGCAGGGAACGGCGTCACC  
AAGGTGTCGATATCTAACGACACGATTCTGAAGATCGCATCGCTAGCCCGTTGTACAGGTACCGGATCCTAAGG  
TACCTAATTGCCTAGAAAGGAGCAGACGATATGGCGTCGCTCCCTGCAGGTCGACTCTAGAAACCAGCAGAGCAT  
ATGGGCTCGCTGGCTGCAGTATTCCCGGGTTCATTAGATCCTAAGGTACCTAATTGCCTAGAAAGGAGCAGACGA  
TATGGCGTCGCTCCCTGCAGGTCGACTCTAGAAACCAGCAGAGCATATGGGCTCGCTGGCTGCAGTATTCCCGGG  
TTCATTAGATCCTAAGGTACCTAATTGCCTAGAAAGGAGCAGACGATATGGCGTCGCTCCCTGCAGGTCGACTCTA  
GAAACCAGCAGACGATATGGGCTCGCTGGCTGCAGTATTCCCGGGTTCATTAGATCCTAAGGTACCTAATTGCCTA  
GAAAGGAGCAGACGATATGGCGTCGCTCCCTGCAGGTCGACTCTAGAAACCAGCAGAGCATATGGGCTCGCTGG  
CTGCAGTATTCCCGGGTTCATTAGATCCTAAGGTACCTAATTGCCTAGAAAGGAGCAGACGATATGGCGTCGCTCC  
CTGCAGGTCGACTCTAGAAACCAGCAGACGATATGGGCTCGCTGGCTGCAGTATTCCCGGGTTCATTAGATCCTAA  
GGTACCTAATTGCCTAGAAAGGAGCAGACGATATGGCGTCGCTCCCTGCAGGTCGACTCTAGAAACCAGCAGAGC  
ATATGGGCTCGCTGGCTGCAGTATTCCCGGGTTCATTAGATCCTAAGGTACCTAATTGCCTAGAAAGGAGCAGAC  
GATATGGCGTCGCTCCCTGCAGGTCGACTCTAGAAACCAGCAGAGCATATGGGCTCGCTGGCTGCAGTATTCCCG  
GGTTCATTAGATCCTAAGGTACCTAATTGCCTAGAAAGGAGCAGACGATATGGCGTCGCTCCCTGCAGGTCGACTC  
TAGAAACCAGCAGACGATATGGGCTCGCTGGCTGCAGTATTCCCGGGTTCATTAGATCCTAAGGTACCTAATTGCC  
TAGAAAGGAGCAGACGATATGGCGTCGCTCCCTGCAGGTCGACTCTAGAAACCAGCAGAGCATATGGGCTCGCT  
GGCTGCAGTATTCCCGGGTTCATTAGATCCTAAGGTACCTAATTGCCTAGAAAGGAGCAGACGATATGGCGTCGC  
TCCCTGCAGGTCGACTCTAGAAACCAGCAGACGATATGGGCTCGCTGGCTGCAGTATTCCCGGGTTCATTAGATCC  
TAAGGTACCTAATTGCCTAGAAAGGAGCAGACGATATGGCGTCGCTCCCTGCAGGTCGACTCTAGAAACCAGCAG  
AGCATATGGGCTCGCTGGCTGCAGTATTCCCGGGTTCATTAGATCCTAAGGTACCTAATTGCCTAGAAAGGAGCA  
GACGATATGGCGTCGCTCCCTGCAGGTCGACTCTAGAAACCAGCAGACGATATGGGCTCGCTGGCTGCAGTATT  
CCGGGTTCATTAGATCTcgcgAAGGGCGAATTcacgaGGCGCGCCcggatcGCGATCGCaatTTAATTAACCTCGAGtct  
agagggcccgttaaaccgctgatcagcctcgactgtgcctctagtgtccagccatctgttggccctccccgtgcttcttgaccctggaagg  
tgccactcccactgtcctttctaataaaaatgaggaaattgcatcgcattgtctgagtaggtgtcattctattctggggggtggggtggggcaggacagc



CGTCGAACGGTCCGGTTATGCAAAAGAAGACGCTAGGTTGGGAAGCGTTTACGGAAACGTTATACCCGGCGGAT  
GGTGGTTTAGAAGGTCGTAATGACATGGCGTTAAAATTAGTAGGTGGTTCGCACTTAATAGCGAACATAAAGACG  
ACGTACCGTTGCAAAAAACCGGCGAAGAATCTAAAGATGCCGGGTGTATACTACGTAGATTACCGACTAGAACGT  
ATAAAGGAGGCGAATAACGAGACGTACGTTGAACAACATGAAGTAGCGGTAGCGGATACTGTGATTTACCGTC  
GAAGCTAGGTCACAACTAAAT

#### U2AF2 codon optimized sequence

tcCgaTttcgaTgagttcgagcggcagctcaacgagaataaacaagagcgggaTaaggagaaccggcatcgggaagcgcagccacagcgcctcta  
gaagcgggaTcgcaaaccgggagccggagccgcgaccggcgcaaccgggaccagcggagcgcctccgggacaggAGAAGAcgcagcaa  
acctttgaccagaggcgtaaagaggagcacggtggactgattAGAtccccagacacgagaagaagaaggcAGAAaatactgggacgt  
gccaccccaggctttgagcatcaccccaatgcagtacaaggccatgcaagctgTggtagattccagccactgctcttcccccatgacccc  
Agacggctggccgtgacccctacccgggtgccgtggcgggagccagatgaccagacaagccggcgcctctactgtggcaacatcccctttggc  
atcactgaggaggccatgatggatttctcaacgccagatgcccctgggAggActgaccagggcccctggcaaccagtggtggctgtgagattaa  
ccaggacaagaatthtgccttttggagtccgctcagtggaTgagactaccaggctatggcctttgatggcatcatctccagggccagtcactGaa  
gatccgcaggcctcacgaTtaccagcTcttctggcatgtcagagaaccctccgtctatgtgcctggAgttgtgtccactgtggctcccgaTtctgc  
ccacaagctgttcatcgAggcCTGcccaactacctgaacgatgaccaggtcaaagagctgctgacatccttgggcccctcaaggccttcaacctg  
gtcaaggacagtgccacgggActctcaagggtacgcttctgtgagtacgtggacatcaacgtcacggatcaggccattgTgggctgaacggca  
tgagctgggAgataagaagctgctggtccagagggcTagtgtgggagccaagaatgccacgctgagccatcaatcagacgctgtgacctgc  
aagtccgggcttgatgagctcccaggtgcagatggcgccaccTactgaggtcctgtgcctcatgaacatggtgctgctgaggagctgctggac  
gacgaggagtatgaggagatcgtggaggatgtgcgggacgagtgacgaagtagggccttcaagtcacgatccccggcctgtggacggc  
gtcaggtgcccggctgcgaaagatcttggagttcacctctgtttgactgccagaaagccatgcagggcctgacgggcccgaagttcgccaa  
cagagtgtgtcacaataactgtgaccccgactctatcacccgggacttctgg

#### 5x SunTag array

GAAGAACTTTTGGAGCAAGAATTATCATCTTGAGAACGAAGTGGCTCGTCTTAAGAAAGTTCTGGCAGTGGAGAA  
GAACTGCTTTCAAAGAATTACCACCTGGAAAATGAGGTAGCTAGACTGAAAAAGGGGAGCGGAAGTGGGGAGG  
AGTTGCTGAGCAAAAATTATCATTTGGAGAACGAAGTAGCAGACTAAAGAAAGGGTCCGGATCGGGTGAGGAG  
TACTCTGAAAAATTATCATCTCGAAAACGAAGTGGCTCGGCTAAAAAAGGGCAGTGGTTCTGGAGAAGAGCTA  
TTATCTAAAAACTACCACCTCGAAAATGAGGTGGCAGCTTAAAAAAGGGAAGTGGCAGTGGT

#### 10x SunTag array

gaagaacttttgagcaagaattatcatcttgagaacgaagtggctcgtcttaagaaggcttggcagtgagagaagaactgcttcaaagaattacca  
cctggaaaatgaggtagctagactgaaaaaggggagcgggaagtggggaggagttgtgagcaaaaattatcattggagaacgaagtagcacgac  
taaagaaaggtccggatcgggtgaggagtactctgaaaaattatcatctcgaaaaacgaagtggctcggctaaaaaagggcagtggttctggaga  
agagctattatctaaaaactaccacctcgaaaaatgaggtggcagcttaaaaaaggggaagtggcagtggtgaagagctatccaagaattatcat  
cttgagaacgaggtagcgcgttgaagaaggttccggctcaggagaggaactgctctcgaagaactatcatcttgaaaatgaggtcgtcgattaaa  
aaagggatcgggagtggtgaggaacttctcaaagaattaccacctcgaaaacgaagtagctcgattaaagaaggttcagggcgggtgaaga  
attactgagtaaaaattatcatctgaaaaatgaggtagcgagactaaaaaaggggagtggttctggcaggaattgctatcgaaaaattatcatctg  
agaacgaagttgtaggtcctcaaaaagggctcaggctcaggc

#### Emi1 5'UTR\_long

gttaggagggagagcagagcgcgcgctaaatcctagagaggcgggctaagctggactggggggagggtccgtcttccggaaaagtctggattccc  
gacgagccgagttgctgctaccgaactcccgttcgagagatgatcgaagaaagtcggctaccattgtacctatcaaagatctccagatggaagcca  
gcgctgaatttgggctgagattaggacttcaggagggcgggtccagaagacggcgggaaggaaatcttggggcgacgcatgctgatagaccctcc  
acagctgtggccggcggcctccccgtgctcggaggtcccggcggcctagatcttccggacgtggggagccgggtgtaaaagaagaaag  
ttctaccctttctgcaaa



Emi1 5'UTR\_short

Aaagtagcagctggcgcctttaagagatacaggtctgtgaagcaggcaggttgctcagctgccccggagcgggttctccacctgaggcagactcca  
cgtcggctggc

scFv-GCN4-sfGFP-GB1 (referred to as scFv-GFP in the manuscript)

ATGGGCCCCGACATCGTGATGACCCAGAGCCCCAGCAGCCTGAGCGCCAGCGTGGGCGACCCGCTGACCATCAC  
CTGCCGAGCAGCACCAGCGCCGTGACCACCAGCAACTACGCCAGCTGGGTGCAGGAGAAGCCCCGCAAGCTGT  
TCAAGGGCCTGATCGGCGGCACCAACAACCGCGCCCCGGCGTGCCAGCCGCTTACGCGGCAGCCTGATCGGCG  
ACAAGGCCACCCTGACCATCAGCAGCCTGCAGCCCCAGGACTTCGCCACCTACTTCTGCGCCCTGTGGTACAGCAA  
CCACTGGGTGTTTCGCCAGGGCACCAAGGTGGAGCTGAAGCGCGGCGGGCGGCAGCGGGCGGGCGGCAGC  
GGCGGCGGGCAGCAGCGGGCGGGCAGCGAGGTGAAGCTGCTGGAGAGCGGGCGGGCCTGGTGCAGCCC  
GGCGGCAGCCTGAAGCTGAGCTGCGCCGTGAGCGGCTTACGCTGACCGACTACGGCGTGAAGTGGGTGCGCCA  
GGCCCCGGCGGGCCTGGAGTGGATCGGCGTGATCTGGGGCGACGGCATCACCGACTACAACAGCGCCCTGA  
AGGACCGTTCATCATCAGCAAGGACAACGGCAAGAACACCGTGTACCTGCAGATGAGCAAGGTGCGCAGCGAC  
GACACCGCCCTGTACTACTGCGTGACCGCCCTGTTGACTACTGGGGCCAGGGCACCCCTGGTACCCTGAGCAGC  
TACCCATACGATGTTCCAGATTACGCTGGTGGAGGCGGAGGTTCTGGGGGAGGAGGTAGTGCGGGTGGTGGTTC  
AGGAGGCGGGCAAGCTTGGATCCAGGTGGAGGTGGAAGCGGTAGCAAAGGAGAAGAAGTCTTCTACTGGAGTT  
GTCCAATTCTTGTGAATTAGATGGTGTGTTAATGGGCACAAATTTCTGTCCGTGGAGAGGGTGAAGGTGATG  
CTACAAACGGAAAACCTCACCTTAAATTTATTTGCACTACTGGAAAACCTGTTCCGTGGCCAACACTTGTCACT  
ACTCTGACCTATGGTGTTCATGCTTTTCCCGTTATCCGGATCACATGAAACGGCATGACTTTTTCAAGAGTGCCAT  
GCCCCAAGGTTATGTACAGGAACGCACTATATCTTTCAAAGATGACGGGACCTACAAGACGCGTGCTGAAGTCAA  
GTTTGAAGGTGATACCCTTGTAAATCGTATCGAGTTAAAGGGTATTGATTTTAAAGAAGATGGAAACATTCTTGA  
CACAACTCGAGTACAACCTTAACTCACACAATGTATACATCACGGCAGACAAAACAAAAGAATGGAATCAAAGCTA  
ACTTCAAATTCGCCACAACGTTGAAGATGGTCCGTTCAACTAGCAGACCATTATCAACAAAATACTCCAATTGGC  
GATGGCCCTGTCTTTTACCAGACAACCATTACCTGTGCACACAATCTGTCTTTGAAAGATCCCAACGAAAAGCG  
TGACCACATGGTCTTCTTGTAGTTTGTAACTGCTGCTGGGATTACACATGGCATGGATGAGCTCTACAAAGGTGGA  
GGTCGGACCGAAGAGTACAAGCTTATCCTGAACGGTAAAACCCTGAAAGGTGAAACCACCACCGAAGCTGTTGAC  
GCTGCTACCGCGGAAAAGTTTTCAAACAGTACGCTAACGACAACGGTGTGACGGTGAATGGACCTACGACGAC  
GCTACCAAAAACCTTACCGGTAACCGAATAA

PP7-2xmCherry-CAAX

ATGTCCAAAACCATCGTTCTTTTCGGTTCGGCGAGGCTACTCGCACTGACTGAGATCCAGTCCACCGCAGACCGTC  
AGATCTTCGAAGAGAAGGTTCGGGCTCTGGTGGGTTCGGCTGCGCCTCACGGCTTCGCTCCGTCAAACCGAGCCA  
AGACCGCGTATCGCGTCAACCTAAAACCTGGATCAGGCGGACGTCGTTGATTGCTCCACCAGCGTCTGCGGGCAGC  
TTCCGAAAGTGCCTACACTCAGGTATGGTTCGACGACGTGACAATCGTTGCGAATAGCACCGAGGCCTCGCGCA  
AATCGTTGTACGATTTGACCAAGTCCCTCGTCGCGACCTCGCAGGTGCAAGATCTTGTGCTCAACCTTGTGCCGCT  
GGGCCGTCTGCGGACCCGCTAGCCTCCTgcgccgcGGTGGTGGTACGCGTGATTGACTAGTGGAGGAAGCGGA  
GGAGGAgtgagcaagggcgaggaggataacatggccatcatcaaggagttcatgcttcaaggtgacatggagggtccgtgaacggccag  
agttcgagatcagggcgaggcgaggccgcccctacgaggccaccagaccgccaagctgaaggtgaccaaggtggccccctcccttcgct  
gggacatcctgtcccctcagttcatgtacggctccaaggcctacgtgaagcaccgcccgcacatccccgactactgaagctgtcctccccagggt  
tcaagtgggagcgcgtgatgaactcaggacggcggtggtgacctgaccaggactcctccctcgaggacggcgagttcatctacaagtgaa  
gctgcgccgaccacactccctccgacggccccgtaatgcagaagaagaccatgggctgggaggcctcctccgagcggatgtacccgaggacggc  
gccctgaagggcgagatcaagcagaggctgaagctgaaggacggcgccactacgacgtgaggtaagaccacctacaaggccaagaagcccgt  
gcagctgccccgcccctacaactcaacatcaagttggacatcacctcccacaacgaggactacacatcgtggaacagtaacgcgcccagggg  
ccgcccactccaccggcgcatggacgagctgtacaagCATGGCATGGATGAGCTCTACAAAGGTGGAGGTTCGGACCGAAGAG



CTCCAGGCTGAGGTAGCCGCTCTGAGGAAGAAGCTCCAAGTGTATGAGGGGGGAGGCCAGCCCCACCACAGGA  
CCTCCCAGGATCTCCAAGTCGGGACCACCACAGAACACCTTCCCAGCTCCCCCTTGCCACCCCACCCTCCCAGCC  
AGCCCTGCACCCAGAGCTCCCTGCAGGGCCTAGAGCCCTTCAAGAGGAGAGTCTGGGGATGGAGGCCAGGTG  
GAGAGGGCCATGGAAGGGAACCTTTCAGACCAGGAGCAGTCCCAGAGGATGAGGATGAAGGCCAGCTGAGG  
AGGTTCCAACCCAGATGCCAGAGCAGAACCCACACATGCACTGCCAGAGTCCCCTGCCTGACCCTGCAGCCAA  
GCCAGTCGTGGGCCACTTCTCAGCACGGGAACTGGATGGGGACCGTTCTAAGCGTTGGCCCTAAAGGTGCTGTG  
CGTTGCCAGCGGCAGTACTCCCTGCTCCAAGCAGCCAACCTCCTGACGCCGACATGATCACAGAGTTTGAGACC  
CTACAGCAGCTGGTGAAGAGGAAAAAATTGAGCCTGGGGCAGAGGCCTTGAGGACTTCAGGCCTGGCCAGGG  
GGGCACCTCTGGCTCAGGAGCTGTGTTGAGAGTCAAAGCCTCCAGGATACACTGGCCCTGTGACCCGGACTATGG  
CGAGGGCAGTGTGGCCCCCTGCACACCCTGGGAATCCCGCCTGGACCAACTGCACCCAGCCAGGGGTCCC  
GATGGCCCATGGAGAAGAAGAGGAGGAGACCAAGCGCCTTGAGGCGACAGTCCCATGGCCCCAAAGCGGGG  
CACCAAGCGCCAGCGCCAGTCCTTCTGCTCCTAAGGAGAGGGTCTCTGCCTGACACCCAACCTTACAGGGG  
CCCAGCACCCCAAAGGAGAAAGGGCCTCCTCCCCCTGCCATTCCCCTCGCGTTTGCCAGCCACAGTCATCAAAA  
GCCGGGTGCCCTGGGCCCTTCCGCCATGCAGAACTGCTCACCCCGCTGGCTCTGCCACTCGAGACCTCAATGC  
CACCTTTGATCTCTGAGGAGCCTCCCTCAAAGCCAGTTTCCATGAATGCATTGGCTGGGACAAAATACCCAG  
GAGCTGAGCAGGCTGGACCAGCCCTTTCATCCCAGGGCACCTGTGCCCTGTTACCATGAAGGGCCCCAAGCCA  
ACATCTTCCCTCCCTGGGACCTCTGCCTGCAAGAAGAAGCGGTTGCGAGTTCTCAGTCTCCATGGCCGAGCC  
GCATCGCCCGCTCCCAGCAGCACTTTGAAGAGGCCAGCTGGGCCCTTGTACTCCAGAGTGCCTTGAGTCC  
CCTGTGCCCTAGCAACCGGAGGAATGGAAGGACCTCATCAGGGTGGGGAGAGCACTCTCAGCAGGGAACGGCG  
TCACCAAGGTGTCCGATATCTAACGACACGATTCGAAGATCGCATCGCTAGCCCGTTGTACAGGTACCGGATCCT  
AAGGTACCTAATTGCCTAGAAAGGAGCAGACGATATGGCGTCGCTCCCTGCAGGTCGACTCTAGAAACCAGCAGA  
GCATATGGGCTCGCTGGCTGCAGTATCCCGGGTTCATTAGATCCTAAGGTACCTAATTGCCTAGAAAGGAGCAG  
ACGATATGGCGTCGCTCCCTGCAGGTCGACTCTAGAAACCAGCAGAGCATATGGGCTCGCTGGCTGCAGTATCC  
CGGGTTCATTAGATCCTAAGGTACCTAATTGCCTAGAAAGGAGCAGACGATATGGCGTCGCTCCCTGCAGGTCGA  
CTCTAGAAACCAGCAGAGCATATGGGCTCGCTGGCTGCAGTATCCCGGGTTCATTAGATCCTAAGGTACCTAATT  
GCCTAGAAAGGAGCAGACGATATGGCGTCGCTCCCTGCAGGTCGACTCTAGAAACCAGCAGAGCATATGGGCTC  
GCTGGCTGCAGTATCCCGGGTTCATTAGATCCTAAGGTACCTAATTGCCTAGAAAGGAGCAGACGATATGGCGT  
CGCTCCCTGCAGGTCGACTCTAGAAACCAGCAGAGCATATGGGCTCGCTGGCTGCAGTATCCCGGGTTCATTAGA  
TCCTAAGGTACCTAATTGCCTAGAAAGGAGCAGACGATATGGCGTCGCTCCCTGCAGGTCGACTCTAGAAACCAG  
CAGAGCATATGGGCTCGCTGGCTGCAGTATCCCGGGTTCATTAGATCCTAAGGTACCTAATTGCCTAGAAAGGA  
GCAGACGATATGGCGTCGCTCCCTGCAGGTCGACTCTAGAAACCAGCAGAGCATATGGGCTCGCTGGCTGCAGTA  
TCCCGGGTTCATTAGATCCTAAGGTACCTAATTGCCTAGAAAGGAGCAGACGATATGGCGTCGCTCCCTGCAGGT  
CGACTCTAGAAACCAGCAGAGCATATGGGCTCGCTGGCTGCAGTATCCCGGGTTCATTAGATCCTAAGGTACCTA  
ATTGCCTAGAAAGGAGCAGACGATATGGCGTCGCTCCCTGCAGGTCGACTCTAGAAACCAGCAGAGCATATGGG  
TCGCTGGCTGCAGTATCCCGGGTTCATTAGATCCTAAGGTACCTAATTGCCTAGAAAGGAGCAGACGATATGGC  
GTCGCTCCCTGCAGGTCGACTCTAGAAACCAGCAGAGCATATGGGCTCGCTGGCTGCAGTATCCCGGGTTCATTA  
GATCCTAAGGTACCTAATTGCCTAGAAAGGAGCAGACGATATGGCGTCGCTCCCTGCAGGTCGACTCTAGAAACC  
AGCAGAGCATATGGGCTCGCTGGCTGCAGTATCCCGGGTTCATTAGATCCTAAGGTACCTAATTGCCTAGAAAG  
GAGCAGACGATATGGCGTCGCTCCCTGCAGGTCGACTCTAGAAACCAGCAGAGCATATGGGCTCGCTGGCTGCAG  
TATCCCGGGTTCATTAGATCTcgcgAAGGGCGAATTCacgaGGCGCGCCcggatcGCGATCGCaatTTAATTAACCTCG  
AGtctagagggccctttaaaccgctgatcagcctcactgtgccttctagtgtccagccatctgtgtttgccccctccccgtccttcttgaccctg  
gaagtgccactcccactgtcctttcctaataaaataggaaattgcatcgattgtctgagtaggtgtcattctattctgggggtgggggtggggcagg  
acagcaagggggaggattgggaagacaatagcaggcatgctggggatgctggggctctatggcttctgaggcggaaagaaccagctggggctcta  
gggggtatccccacgccccctgtagcggcgcatagcgcggcggtgtggtggttacgcgcagcgtgaccctacacttgccagcgccctagcggcc  
gctccttctgcttcttcccttcttctcggccagttcggcgcttccccgtcaagctctaaatcgggggtccctttagggttccgatttagtcttacg  
gcacctgacccccaaaaaacttgattagggatggttacgtagtgggcatcgcctgatagacggttttgcctttgacgttggagtcacggtt  
ttaaagtgaggactctgttccaaactggaacaacactcaacctatctcggctattcttttgattataagggattttgcccatttcggcctattggttaa  
aaaatgagctgatttaacaaaaatthaacgcgaattaattctgtgAATGTGTGTCAGTTAGGGTGTGGAAGTCCCAGGCTCCC

CAGCAGGCAGAAGTATGCAAAGCATGCATCTCAATTAGTCAGCAACCAGGTGTGGAAAGTCCCAGGCTCCCCAG  
CAGGCAGAAGTATGCAAAGCATGCATCTCAATTAGTCAGCAACCATAGTCCCGCCCCTAACCTCCGCCATCCCCGC  
CCTAACTCCGCCAGTTCCGCCATTCTCCGCCCATGGCTGACTAATTTTTTTTATTTATGCAGAGGCCGAGGCCG  
CCTCTGCCTCTGAGCTATTCCAGAAGTAGTGAGGAGGCTTTTTTGGAGGCCTAGGCTTTTGCAAAAAGCTCCcgga  
gcttgatataccatctcgatcagcagctgttgacaattaatcatcgcatagatatacggcatagataatacagacaaggtgaggaactaaac  
catggccaagttgaccagtgccgtccgggtgctcaccgcgcgacgctcgggagcggtcgagttctggaccgaccggctcgggttctccgggactt  
cgtggaggacgacttcgccggtgtggtccgggacgacgtgaccctgttcatcagcgcggtccaggaccaggtggtcgggacaacacctggcctgg  
gtgtgggtgcgccgctggacgagctgtacgaggtggtcggaggtcgtgtccacgaactccgggacgctccgggcccggccatgaccgagatcg  
gagcagcagcgtgggggcccggagttcgccctgcgcgaccggccgcaactgctgacttctggccgaggagcaggactgacacgtgctacgag  
atctgattccaccgccccttctatgaaaggtgggcttcggaatcgtttccgggacgcccggctggatgctcctccagcgcggggatctcatgctgga  
gttcttcgcccacccaactgtttattgagcttataatggttacaataaagcaatagcatcacaatttcacaataaagcattttttcactgcatc  
tagttgtggtttgtccaaactcaatgtatcttatcatgctgtataccgtcgacctctagctagagcttggcgaatcatggtcatagctgtttcctgtg  
tgaaatgttatccgctcacaattccacacaatacagaccggaagcataaagtgaaagcctggggtgcctaagagtgagtaactcacaataat  
tgctgtgctcactgcccgtttccagtcgggaaacctgctgctccagctgcattatgaatcgccaacgcgcggggagaggcggtttcgatattgg  
gctcttccgcttctcgtcactgactcgtcgcctcggctggtcggctcggcgagcggatcagctcactcaaggcggaataacggttatccaca  
gaatcaggggataacgcaggaagaacatgtgagcaaaaggccagcaaaaggccaggaaccgtaaaaaggccgctgtgctggcgtttttccatag  
gctccgccccctgacgagcatcacaataatcgagctcaagtcagaggtggcgaaccgcagaggactataaagataaccaggcgtttccccctgga  
agctccctcgtgctctcgttccgacctgcccgttaccggatacctgctccgctttctccctcgggaagcgtggcgttttctcatagctcagcgtg  
aggtatctcagttcgggtgtaggtcgttcgctccaagctgggtggtgacgcaacccccgttccgcccaccgctgccttatccggtaactatcgtc  
ttgagccaaccggtaagacacgacttatcgccactggcagcagccactggtaacaggattagcagagcgaggtatgtagggctctacagagtt  
ctgaagtggtggcctaactacggctacactagaagaacagatatttggtatctgcgctcctgctgaagccagttaccttcggaaaaagagttggtagctc  
ttgatccggcaaaaaccaccgctgtagcggtttttgttgaagcagcagattacgcgcaaaaaaaggatctcaagaagatcctttgatctt  
ttctacggggtctgacgctcagtggaacgaaaactcacgtaagggttttggctcatgagattatcaaaaaggatcttccactagatcctttaaattaa  
aatgaagtttaaatcaatcaaatatagtaaaacttggtctgacagttaccaatgcttaatcagtgaggcacctatctcagcagatctgctatt  
tcgttcatcatagttgctgactccccctgctgtagataactacgatacgggagggcttaccatctggccccagtgctgcaatgataccgcgagacc  
acgctcaccggctccagattatcagcaataaaccagccagccggaaggccgagcgcagaagtggtcctgcaactttatccgctccatccagctca  
ttaattgttccgggaagctagagtaagtagttcggcagtaatagtttgcgaacgttggcattgctacaggcatcgtggtgtcacgctcgtcgtt  
ggatggcttattcagctccggttccaacgatcaaggcaggtacatgatccccatggtgtgcaaaaaagcggttagctccttcggtcctccgatcg  
ttgtcagaagtaagttggccgaggttatcactcatggtatggcagcactgcataattcttactgtcatgcatccgtaagatgcttttctgtgactg  
gtgagtaactcaaccaagtcattctgagaatagtgatgctggcagccaggtgcttggccggtcaatacgggataataccgcccacatagcaga  
actttaaaagtgctcatcattggaacgttcttccggggcgaaaaactctcaaggatcttaccgctgttgagatccagttcagatgaacccactcgtgac  
ccaactgatctcagcatctttactttaccagcgtttctgggtgagcaaaaacaggaaggcaaaatgcccaaaaaagggaataagggcgacacg  
gaaatgtgaatactcactcttcttttcaatattattgaagcattatcagggttattgtctcatgagcggatacatatttgaaatgatttagaaaa  
taaacaataagggttccgcgacatttcccgaaaaagtgccacctgacgtc

tdPP7-3xmCherry

tgtcacctaaatcgtatgtatgatacataaggttatgtattaattgtagccggttctaacgacaatgtacaagcctaattgtgtagcatctggctt  
actgaagcagaccctatcatctctcgtaaactgccgtcagagtcggtttgggtggacgaaccttctgagtttctggtaacgctcccgcaccggaa  
atggtcagcgaaccaatcagcagggtcatcgtagccagatctctacgccggacgcatcgtggccggcatcaccggcggcaggtcggttctg  
gctctatatacggcagatcaccgatggggaagatcgggctcggcacttccggctcatgagcgttggcgtgggtatggtggcaggccccgtg  
ccgggggactgttgggcccactctcttgcagcaccattccttgcggcggcgggtcctaacggcctcaactactagggtgcttctaatgcagga  
gtcgcataaggagagcgtcgaatggtgactctcagtaaatctagctctgatccgcatagttagccagccccgacaccgccaacaccgctga  
cgcacctgacgggcttctgctcctccggcatccgcttacagacaagctgtgacgctcctccgggagctgcatgtgacagaggtttaccgctcataccg  
aaacgcgcgagacgaaagggcctcgtgatacgcctattttataggtaatgtcatgataataatggtttcttagacgtcaggtggcactttcggggaa  
atgtgcgccaacccctattgttttttctaaatacattcaaatatgtatccgctcatgagacaataaccctgataaatgcttcaataatattgaaa  
aggaagagtagatattcaacatttccgtgctccctattccctttttgctgcattttctccttctgttctcaccgagaacgctggtgaaagta  
aaagatgctgaagatcagttgggtgacaggtgggtacatcgaactggatctcaacagcggttaagatccttgagagttttcggccgaagaacgtttt

ccaatgatgagcacttttaaagttctgctatgtggcgcggtattatcccgtattgacccgggcaagagcaactcggtcgccgatacactattctcaga  
atgacttggtgagtagtactcaccagtcacagaaaagcatcttacggatggcatgacagtaagagaattatgagtgctgccataaccatgagtgataac  
actgcgccaacttacttctgacaacgatcggaggaccgaaggagtaaccgctttttgcacaacatgggggatcatgtaactcgcttgatcgttgg  
gaaccggagctgaatgaagcacaacgacgagcgtgacaccacgatgcctgtagcaatggcaacaacgttgcgcaaactattaactggcgaa  
ctactacttagcttcccggcaacaattaatagactggatggaggcgataaaagttgaggaccacttctcgctcgcccttccggctggctggtta  
ttgctgataaacttgagccggtagcgtgggtctcggtatcattgacgactggggccagatggaagccctccgtagctagttatctacacga  
cggggagtcaggcaactatggatgaacgaaatagacagatcgtgagataggtgcctcactgattaagcattggaactgtcagaccaagttactca  
tatatactttagattgatttaaacttcatTTTTAATTTAAAGGATCTAGGTGAAGATCCTTTTGATAATCTCATGACAAAATCCCTAACGTGAGTTT  
CGTCCACTGAGCGTCAGACCCGTAGAAAAGATCAAAGGATCTTGTGAGATCCTTTTTCTGCGCTAATCTGCTGTTGCAACAAAAAACCC  
GCTACCAGCGGTGTTTGTTCGGATCAAGAGCTACCAACTTTTTCCGAAGGTAAGTGGTTGAGGAGCGAGATACCAAACTGTCCTTCTA  
GTGTAGCCGTAGTTAGGCCACCCTCAAGAACTGTAGCACCCTACATACTCGTCTGCTAATCCTGTACCAGTGGCTGCTGCCAGTGGCGATA  
AGTCGTCTTACCGGTGGACTCAAGACGATGTTACGGATAAGGCGAGCGGTGCGGCTGAACGGGGGTTCTGTACACAGCCAGCTTGGGA  
CGAACGACTACCCGAAGTACAGCGTGTGATGAGAAAAGCGCCACGCTCCGAAGGGAGAAAGGCGGACAGGTATCCGGTAA  
GCGGCAGGGTCGGAACAGGAGAGCGCACGAGGGAGCTTCCAGGGGAAACGCTGGTATCTTATAGTCTGTGCGGTTTCCACCCTGACTGAG  
CGTCGATTTTGTGATGCTGTCAGGGGGCGGAGCCTATGGAAAAACGCCAGCAACGCGGCTTTTACGGTCTGCGCTTTTGTGGCTTTTGTCA  
CATGTTCTTCTGCTTATCCCCTGATTCTGTGGATAACCGTATTACCGCTTGTAGTGAGCTGATACCGCTCGCGCAGCCGAACGACCGAGCGCAGC  
GAGTCAGTGAGCGAGGAAGCGGAAGAGCGCCAATACGCAAACCGCTCTCCCGCGCTGGCCGATTCAATGAGCTGTGGAATGTGTGTC  
GTTAGGTTGTGAAAGTCCCAGGCTCCCAGCAGGAGGATGCAAGATGTCATCTCAATTAGTCAGCAACAGGTGTGAAAGTCCCAGGC  
TCCCAGCAGGAGAAAGTATGCAAGCATGTCATCTCAATTAGTCAGCAACCATAGTCCCCTAAGTCCGCCATCCGCCCCAAGTCCGCCCCAGT  
TCCGCCATCTCCGCCATGGCTGACTAATTTTTTATTATGCAAGGCGGAGGCGCCTCGGCTCTGAGCTATCCAGAAGTAGTAGGAGGCTT  
TTTTGGAGGCTAGCTTTGCAAAAAGCTTGGACACAAGACAGGCTTGCAGATATGTTGAGAATAACCTTTATCCCGCTCAGGGAGAGGCACTG  
CGTAAAAAGACGGACTCATGTGAAATACTGGTTTTAGTGCAGCAGATCTATAATCTCGCAACCTATTTCCCTCGAACCTTTAAGCCGTA  
GATAAACAGGCTGGGACACTTCATGAGCGAAAAATACATGTCACCTGGGACATGTTGAGATCCATGCAGTAAACTGCAAGCCGACTGATGC  
CTTCTGAACAATGGAAAGGCATTATTGCCGTAAGCGTGGCGGTCTGTACCGGTTGCTTACTGGCGCTGAAGTGGTATCTGTCATGTCGATAACGTT  
TGATTTCCAGCTACGATCAGACAACGCGGAGCTTAAAGTGTGAAACGCGCAGAAGGCGATGGCAAGGCTTCACTGTTATGATGACTGGT  
GGATACGGTGGTACTCGGTTGCGATTCTGAAATGTATCAAAGCGCACTTGTACCATCTTCAAAAACGGCTGCTGCTGCTGGTTGATGAC  
TATGTTGTGATATCCGCAAGATACCTGGATTGAACAGCCGTGGGATATGGGCTGCTATTCTGCCCAATCTCCGCTGCTAATCTTTCAACGCT  
GGCACTGCGGGCGTTGTTCTTTAAGTTCAGGCGGGTACAATAGTTCCAGTAAGTATTCTGGAGGCTGATCCATGACACAGGCAAACTGAGCGA  
AACCTGTCAAACCCGCTTAAACATCTGAAACCTGACGCTAGTCCGCGCTTAAATCACGGCGCACAACCGCTGTGAGTGGCCCTGATGGT  
AAAACCATCCCTCACTGGTATCGCATGTTAACGCTGTGATGGATCTGGCGGGCATTGACCCACGGAATCTCGAGCTCCAGGACGATTTGT  
ATGAGCGATGCCAACGTACCGACGATGTTATACGATACGGTATTGGCTACCTGGCGGCAACTGGATTTATGAGTGGGCCCCGGATCTTTGAA  
GGAACCTACTTCTGTGGTGTGACATAATTGGACAACTACTACAGAGATTTAAAGCTAAGGTAATAAAAATTTAAGTGTATAATGTGTTAAA  
CTACTGATTCAATGTTGTGATTTAGATTCAACCTATGGAAGTATGAAAGGAGCAGTGGTGAATGCCTTAAATGAGGAAAACCTGTTTGTCTC  
AGAAGAAATGCCATCTAGTATGAGGCTACTGCTGACTCTCAACTTACTCTCAAAAAGAAGAGAAAGGTAGAAGACCCCAAGGACTTT  
CCTCAGAATTGCTAAGTTTTAGTCTGCTGTTTGTAAATAGAACTCTGCTGCTTTGCTATTTACACCACAAAAGGAAAAGCTGACTGCTATAC  
AAGAAAATTAGGAAAATATTCTGTAACCTTATAAGTAGGCATAACAGTTATAATACATACTGTTTTTCTACTCCACAGGATAGAGTGT  
CTGTATTAATAACTATGCTCAAAAATTGTGACTTTAGCTTTAATTTGTAAGGGGTTAATAAGGAATATTGATGTATAGTGCCTTGACTAGAGATC  
ATAATCAGCCATACCATTGTAGAGGTTTTACTGCTTAAAAACCTCCACACCTCCCTGAACCTGAAACATAAAATGAATGCAATTGTTGTG  
TTAACTGTTATTGCACTTATAATGGTTACAATAAAGCAATGATCACAATTTCAAAAATAAGCATTTTTTCACTGACTTCTAGTTGTTGTTG  
CCAACTCATCAATGATCTTATCATGCTGGATCAACTGGATAACTAAGTAAACCAAAATCATCCAAACTCCACCCATACCCTATTACCCTGC  
CAATTACCTAGTGGTTTACTTACTTAACTGTGATCCTCTGAATTTTTATTAAAGAAATTGATTTGTTAAATATGTACTACAACTTAGTAGTT  
GGAAGGGCTAATCACTCCAAAAGACAGATACCTGATCTGTGGATCTACACACAAAGGCTACTTCCCTGATTAGCAGAATAACACACCAG  
GGCCAGGGGTCAGATACCACTGACCTTGGATGGTGTACAAGCTAGTACCAGTTGAGCCAGATAAGGTAGAAGGGCAATAAAGGAGAGAAC  
CCAGCTTGTACACCTGTGAGCCTGCATGGGATGGATGACCCGAGAGAGAAAGTGTAGTGGAGGTTGACAGCCCTAGCATTTTATCAGCTG  
GCCGAGAGCTGCATCCGGAGTACTCAAGAAGTGTGATCGAGCTGTCAAGGGACTTCCGCTGGGACTTCCAGGGAGGCGTGGCTGGG  
CGGACTGGGAGTGGCGAGCCCTCAGATCCTGCATATAAGCAGCTGTTTTGCTGTACTGGGCTCTCTGTTAGACCAGATCTGAGCCTGGGAGCT  
CTCTGGCTAAGGAAACCACTGCTAAGCCTCAATAAGCTGCTTGAAGTGTGCTTCAAGTAGTGTGCTCCGCTGTTGTGACTGCTGTAACAG  
GATCCCTCAGACCTTTAGTCAAGTGTGAAAATCTTAGCAGTGGCGCCGAACAGGGACTTGAAGCGAAAGGGAACAGAGGAGCTCTCTCGA

cgcaggactcggcttgctgaagcgcgcacggcaagaggcgagggcgcgactggtagtacgcaaaaatgactagcggaggctagaagga  
gagagatgggtgagagcgtcagttataagcgggggagaattagatcgcgatgggaaaaatcggttaagccagggggaaagaaaaata  
aataaaacatatagtagtgggcaagcaggagctagaacgattcgcagttatcctggcctgtagaaacatcagaaggcttagacaaactggg  
acagctacaacatcccttcagacaggatcagaagaacttagatcattatataatacagtagcaaccctctattgtgtgcatcaaaggatagagata  
aagacaccaaggaagctttagacaagatagaggaagagcaaaacaaagtaagaccaccgcacagcaagcggcgggtgatcttcagacctggac  
gatatatatgagggacaattggagaagtgaattataataaataaagtagtaaaaattgaaccattaggagtagcaccaccaaggaagagaag  
agtgggtcagagagaaaaagagcagtggggaataggagctttgtccttgggttctgggagcagcaggaagcactatgggcgacgctcaatgac  
gctgacggtagcagccagacaattattgtctggtatagtgacgagcagaacaatttgctgagggctattgaggcgcaacagcatctgtgcaactca  
cagctcggggcatcaagcagctccaggcaagaatcctggctgtggaagatacctaaaggatcaacagctcctggggattgggggtgctctggaaa  
actcatttgcaccactgctgtgccttggatgctagtggagtaataatcttggacagatttggatcacacgacctggatggagtgggacagaga  
aattaacaattacacaagcttaatacactccttaattgaagaatcgaaaaccagcaagaaaagaatgaacaagaattattggaattagataatgg  
gcaagtttgggaattggttaacatacaaaattggctgtggtatataaaattattcataatgatagtaggaggcttgtaggttaagaatagttttgc  
tgtactttctatagtagaagtagtaggacaggatattcaccattatcgttcagaccacctcccaaccccgaggggacccgacaggccgaaggaat  
agaagaagaaggtggagagagagacagagacagatccattcgattagtagaacggatctcgacgggATcgccaaatggcagttatccacaattt  
taaagaaaaaggggggattggggggtacagtcaggggaaagaatagtagacataatagcaacagacatacaaaactaaagaattacaaaaaca  
attacaaaattcaaaatctcggtttattacagggacagcagagatccagttggatcgataagcttgatcgatcgaattcctgcagccccgataaaat  
aaaagattttattagctccagaaaaaggggggaatgaaagacccacctgtaggttggcaagctagctgcagtaacgccattttgcaaggcatgg  
aaaaataccaaccaagaatagagaagttcagatcaaggcgggtacatgaaaaatagtaacgttgggccaacaggatctcggtgagcagtt  
tcggccccggccccgggccaagaacagatggtcaccgagtttcggccccggccccaggccaagaacagatggtccccagatattggcccaaccctc  
agcagtttctaagaccatcagatgttccaggctcccccaaggacctgaatgacctgccttattgaattaaccaatcagcctgcttctcgctc  
tgttcgcgcttctgcttcccagctctataaaagactcaaacccctcactcggcgcgccagctcctccgacagactgagtcgccccggggggatct  
ggagctctcgagaattctcAcgcccGGATCCGCCACCATGTCCAAAACCATCGTTCTTTTCGGTTCGGCGAGGCTACTCGCAC  
TCTGACTGAGATCCAGTCCACCCGAGACCGTCAGATCTTCGAAGAGAAGGTCGGGCCTCTGGTGGGTTCGGCTGCG  
CCTCACGGCTTCGCTCCGTCAAACCGGAGCCAAGACCGCGTATCGCGTCAACCTAAACTGGATCAGGCGGACGT  
CGTTGATTGCTCCACCAGCGTCTGCGGCGAGCTTCGAAAGTGCCTACACTCAGGTATGGTCGCACGACGTGAC  
AATCGTTGCGAATAGCACCGAGGCCTCGCGCAAATCGTTGTACGATTTGACCAAGTCCCTCGTCGCGACCTCGCAG  
GTCGAAGATCTTGTCGTAACCTTGTGCCGCTGGGCCGTCTGCGGACCCGCTAGCCTCCTgggccgcTCCAAAACC  
ATCGTTCTTTTCGGTTCGGCGAGGCTACTCGCACTCTGACTGAGATCCAGTCCACCGCAGACCGTCAGATCTTCGAAG  
AGAAGTTCGGGCCTCTGGTGGTTCGGCTGCGCCTCACGGCTTCGCTCCGTCAAACCGGAGCCAAGACCGCGTATC  
GCGTCAACCTAAACTGGATCAGGCGGACGTGCTGATTGCTCCACCAGCGTCTGCGGCGAGCTTCGAAAGTGC  
GCTACACTCAGGTATGGTCGCACGACGTGACAATCGTTGCGAATAGCACCGAGGCCTCGCGCAAATCGTTGTACG  
ATTTGACCAAGTCCCTCGTCGCGACCTCGCAGGTGAAGATCTTGTCGTAACCTTGTGCCGCTGGGCCGTCTGTC  
GGACCCGCTAGCTCCACGCGTATTGACTAGTGGAGGAAGCGGAGGAGGAgtagcaagggcgaggaggataacatg  
gccatcatcaaggagttcatgcctcaaggtgcacatggagggtccgtgaacggccacagttcagatcagggcgagggcgagggccgcccct  
acgagggcaccagaccgcaagctgaaggtgaccaaggggtggccccctgccttcgctgggacatcctgtcccctcagttcatgtacggctccaag  
gcctacgtgaagcaccgacatccccgactactgaagctgtcctccccgagggctcaagtgaggagcgcgtgatgaactcaggacggcgg  
cgtggtgacctgaccaggactcctcctgcaggacggcagttcatctacaaggtgaagctgcgcccaccaactcccctccgacggccccgtaa  
tgagaagaagaccatgggtgaggcctcctccgagcggatgtacccgaggacggcgcctgaagggcgagatcaagcagaggctgaagctg  
aaggacggcggccactacgacgctgaggtcaagaccactacaaggccaagaagcccgtgcagctgcccggcgctacaacgtcaacatcaagttg  
gacatcactcccacaacaggactacaccatcgtggaacagtagcaacgcgagggccgactccaccggcgcatggacgagctgtacaag  
CATGGCATGGATGAGCTCTACAAAGGTGGAGGTCCGACCGAAGAGTACAAGCTTATCTGAACGGTAAAACCTG  
AAAGGTGAAACCACCAGGACTGTTGACGCTGCTACCGCGAAAAAGTTTTCAAACAGTACGCTAACGACAAC  
GGTGTGACGGTGAATGGACCTACGACGACGCTACAAAACCTTCACGGTAACCGAAGCTAGTGGAGGAAGCGG  
AGGAGGAgtagcaagggcgaggaggataacatggccatcatcaaggagttcatgcctcaaggtgcacatggagggtccgtgaacggccac  
gagttcagatcagggcgagggcgagggcccccctacagggcaccagaccgcaagctgaaggtgaccaaggggtggccccctgccttcgccc  
tgggacatcctgtcccctcagttcatgtacggctccaaggtcactgaagcaccgacatccccgactactgaagctgtcctccccgagggc  
ttcaagtgggagcgcgtgatgaactcagaggacggcggcgtggtgacctgacccaggactcctcctgcaggacggcgagttcatctacaaggtga  
agctgcgcccaccaactcccctccgacggccccgtaatgagaagaagaccatgggctgggaggcctcctccgagcggatgtacccgaggacg

gcgccctgaagggcgagatcaagcagaggctgaagctgaaggacggcggccactacgacgctgaggtcaagaccactacaaggccaagaagccc  
gtgcagctgccggcgctacaacgtcaacatcaagttggacatcacctcccacaacgaggactacaccatcgtggaacagtagcaaacgcgccgagg  
gccgccactccaccggcgcatggagctgtacaagCATGGCATGGATGAGCTCTACAAAGGTGGAGGTCGACCGAAGA  
GTACAAGCTTATCCTGAACGGTAAAACCTGAAAGGTGAAACCACCGAAGCTGTTGACGCTGCTACCGCGGA  
AAAAGTTTTCAAACAGTACGCTAACGACAACGGTGTGACGGTGAATGGACCTACGACGACGCTACCAAAACCTT  
CACGGTAACCGAAGCTAGTGGTGGTGGTGGTAGCGGTGGTGGTAGCagcttaccggtcgcGAATTCGGTgtgagcaagg  
gcgaggaggataacatggccatcatcaaggagttcatgcctcaaggtgcacatggagggtccgtgaacggccacgagttcgagatcgagggcg  
agggcgagggcgcccctacgagggcaccagaccgccaagctgaaggtgaccaagggtggccccctgccctcgcctgggacatcctgtcccctca  
gttcatgtacggtccaaggcctactgaagcaccgccgacatccccgactactgaagctgtccttccccgagggctcaagtgaggagcgtgat  
gaacttcgaggacggcggcgtggtgacctgaccaggactcctccctgcaggacggcgagttcatctacaaggtgaagctgcgcgccaccaacttc  
ccctccgacggccccgtaatgcagaagaagaccatgggctgggaggcctcctccgagcggatgtacccgaggacggcgccctgaagggcgagatc  
aagcagaggctgaagctgaaggacggcggcactacgacgctgaggtcaagaccactacaaggccaagaagcccgtgcagctgccggcgcccta  
caactcaacatcaagttggacatcacctcccacaacgaggactacaccatcgtggaacagtagcaaacgcggcggggccactccaccggcgg  
catggacgagctgtacaagCATATGtaaGCGGCcgtaccttaagaccaatgacttacaaggcagctgtagatcttagccactttttaaagaaa  
aggggggactggaagggctaattcactccaacgaagacaagatctgcttttctgtactgggtctcctggttagaccagatctgagcctgggagc  
tctctggctaactaggaaccactgcttaagcctcaataaagcttgcctgagtgcttcaagtagtgtgtgcccgtctgtgtgactctggtaactag  
agatccctcagacccttttagtcagtggtgaaaatctctagcagcatctagaattaattccgtgtattctatag

#### SunTag<sub>24x</sub>-mCherry

ATGGGCGCCATCATACACGCGCCGCAATCATcggtccgGGTGGATCTGGAGGTGGAGGTTCTGGAGGAGAAGAA  
CTTTGAGCAAGAATTATCATCTTGAGAACGAAGTGGCTCGTCTTAAGAAAGGTTCTGGCAGTGGAGAAGAAGTCTG  
CTTCAAAGAATTACCACCTGGAAAATGAGGTAGCTAGACTGAAAAAGGGGAGCGGAAGTGGGGAGGAGTTGCT  
GAGCAAAAATTATCATTTGGAGAACGAAGTAGCAGACTAAAGAAAGGGTCCGGATCGGGTGGAGGTTACTCT  
CGAAAAATTATCATCTCGAAAACGAAGTGGCTCGGCTAAAAAGGGCAGTGGTTCTGGAGAAGAGCTATTATCTA  
AAAATACCACCTCGAAAATGAGGTGGCAGCTTAAAAAGGGAAAGTGGCAGTGGTGAAGAGCTACTATCCAAG  
AATTATCATCTTGAGAACGAGTAGCGGTTTGAAGAAGGTTCCGGCTCAGGAGAGGAACTGCTCTCGAAGAAC  
TATCATCTTGAAGTGGTGGCTCGATTAAGAAAGGGATCGGGCAGTGGTGGAGGAACTACTTTCAAAGAATTAC  
CACCTCGAAAACGAAGTAGCTCGATTAAGAAAGGTTAGGGTCCGGTGAAGAATTACTGAGTAAAAATTATCAT  
CTGGAAGTGGTAGCGAGACTAAAAAGGGGAGTGGTTCTGGCGAAGAGTTGCTATCGAAAAATTATCATCTT  
GAGAACGAAGTTGCTAGGCTCAAAAAGGGCTCAGGCTCAGGCGAGGAGTTGCTCTCGAAAAACTACCACTTGGAA  
AATGAGGTCGCGAGTTGAAAAAGGGGAGCGGGTCCGGGCGAGGAGTTATTGAGCAAAAATTATCATTTAGAG  
AACGAAGTCGCGCTTAAAGAAAGGCTCGGGCTCGGGCGAAGAAGTCTTATCGAAGAAGTACCACCTCGAAAAT  
GAGGTCGCCAGTTGAAAAAGGGCAGTGGCAGCGGGGAGGAACTCTTGAAGCAAGAAGTACCACCTGGAGAATG  
AGGTCGCGAGATTGAAGAAAGGTCGGGGAGCGGCGAGGAATTGCTCAGCAAGAATTATCATTTGGAGAACGA  
AGTCGCCAGGCTCAAGAAAGGCTCGGGTCCGGGGAGGAATTGTTGAGTAAAAACTACCACTTGGAAAATGAAG  
TCGCCAGGCTCAAAAAGGGAGTGGGAGCGGCGAAGAGTTATTGAGCAAAAATTACCACCTGGAGAACGAAGTG  
GCAAGGCTCAAGAAAGGGAGCGGCGAGCGGGGAGGAGCTTATCGAAGAAGTACCACCTAGAGAATGAAGTCGC  
CCGTTGAAGAAAGGCTCGGGGAGCGGGGAAGAGCTTTGAGCAAGAAGTACCACCTGGAAAATGAGGTGGCGC  
GCTTGAAGAAAGGGAGCGGGAGCGGGGAAGAGTTACTATCTAAGAATTATCATCTCGAGAACGAGGTGGCTCGA  
CTAAGAAGGGTCCGGCAGTGGGGAGGAACTCCTGTGAAGAAGTACTATCATCTTGAAGTGGAGTTGCAAGACTT  
AAAAAGGGTCCGGATCAGGTGAGGAACTACTCAGTAAGAATTACCACCTGGAAAACGAAGTTGCACGTTTGAAG  
GAAAGGATCAGGATCAGGCGAAGAAGTCTCTCAAAGATTATCATTTGGAAGTGGAGTTGCACGTTTAAAAAA  
GGGAAGTGGCAGTGGTGGAGGAACTTCTGTGAAGAAATTATCATCTCGAGAATGAAGTAGCCGACTTAAAAAGG  
GTTCTGGCTCGGGTACGCGCCGACCGGTCAGTGGAGGAGAACCCTGGACCTCCAAGAAGAAGCGCAAGGTG  
GGAGGAGCGGAACTAGTgtgagcaagggcgaggaggataacatggccatcatcaaggagttcatgcctcaaggtgcacatggagggc  
tccgtgaacggccacgagttcgagatcgagggcgagggcgagggcgcccctacgagggcaccagaccgccaagctgaaggtgaccaagggtg  
ccccctgccctcgcctgggacatcctgtcccctcagttcatgtacggctccaaggcctactgaagcaccgccgacatccccgactactgaagctg

tccttccccgagggcttcaagtgggagcgcgtgatgaacttcgaggacggcggcgtggtagaccgtgacccaggactcctccctcaggacggcggagtt  
catctacaaggtgaagctgcgcgccaccaacttcccctccgacggccccgtaatgcagaagaagaccatgggctgggaggcctcctccgagcggatg  
tccccgaggacggcgcctgaagggcgagatcaagcagaggctgaagctgaaggacggcggccactacgacgctgaggtcaagaccacctaaa  
ggccaagaagcccgtgcagctgcccggcgctacaactcaacatcaagttggacatcacctcccacaacgaggactacacctcgtggaacagtac  
gaacgcgccgagggccgccaactccaccggcggcatggacgagctgtacaagTGA

sfGFP-NLS-PP7<sub>24x</sub>

ATGAGCAAAGGAGAAGAAGAACTTTTCACTGGAGTTGTCCAATTCTTGTTGAATTAGATGGTGATGTTAATGGGCACA  
AATTTTCTGTCCGTGGAGAGGGTGAAGGTGATGCTACAAACGGAAAACCTACCCTTAAATTTATTTGCACTACTGG  
AAAACCTACCTGTTCCGTGGCCAACACTTGTCACTACTCTGACCTATGGTGTTCAATGCTTTTCCCGTTATCCGGATCA  
CATGAAACGGCATGACTTTTTCAAGAGTGCCATGCCGAAGGTTATGTACAGGAACGCACTATATCTTTCAAAGAT  
GACGGGACCTACAAGACGCGTGCTGAAGTCAAGTTTGAAGGTGATACCCTTGTTAATCGTATCGAGTTAAAGGGT  
ATTGATTTTAAAGAAGATGGAAACATTCTTGACACAAACTCGAGTACAACCTTAACTCACACAATGTATACATCAC  
GGCAGACAAAACAAAAGAATGGAATCAAAGCTAACTTCAAATTCGCCACAACGTTGAAGATGGTTCCGTTCAACT  
AGCAGACCATTATCAACAAAATACTCCAATTGGCGATGGCCCTGTCTTTTACCAGACAACCATTACCTGTCGACAC  
AATCTGTCCTTTGAAAGATCCCAACGAAAAGCGTGACCACATGGTCCTTCTGAGTTTGTAACTGCTGCTGGGATT  
ACACATGGCATGGATGAGCTCTACAAACCCAAGAAGAAGCGCAAGGTGGATATCTAACGACACGATTCGAAGATC  
GCATCGCTAGCCCGTTGTACAGGTACCGGATCCTAAGGTACCTAATTGCCTAGAAAGGAGCAGACGATATGGCG  
TCGCTCCCTGCAGGTCGACTCTAGAAACCAGCAGAGCATATGGGCTCGCTGGCTGCAGTATCCCGGGTTCATTAG  
ATCCTAAGGTACCTAATTGCCTAGAAAGGAGCAGACGATATGGCGTCGCTCCCTGCAGGTCGACTCTAGAAACCA  
GCAGAGCATATGGGCTCGCTGGCTGCAGTATCCCGGGTTCATTAGATCCTAAGGTACCTAATTGCCTAGAAAGG  
AGCAGACGATATGGCGTCGCTCCCTGCAGGTCGACTCTAGAAACCAGCAGAGCATATGGGCTCGCTGGCTGCAGT  
ATTCCCGGGTTCATTAGATCCTAAGGTACCTAATTGCCTAGAAAGGAGCAGACGATATGGCGTCGCTCCCTGCAGG  
TCGACTCTAGAAACCAGCAGAGCATATGGGCTCGCTGGCTGCAGTATCCCGGGTTCATTAGATCCTAAGGTACCT  
AATTGCCTAGAAAGGAGCAGACGATATGGCGTCGCTCCCTGCAGGTCGACTCTAGAAACCAGCAGAGCATATGGG  
CTCGCTGGCTGCAGTATCCCGGGTTCATTAGATCCTAAGGTACCTAATTGCCTAGAAAGGAGCAGACGATATGGC  
GTCGCTCCCTGCAGGTCGACTCTAGAAACCAGCAGAGCATATGGGCTCGCTGGCTGCAGTATCCCGGGTTCATTA  
GATCCTAAGGTACCTAATTGCCTAGAAAGGAGCAGACGATATGGCGTCGCTCCCTGCAGGTCGACTCTAGAAACC  
AGCAGAGCATATGGGCTCGCTGGCTGCAGTATCCCGGGTTCATTAGATCCTAAGGTACCTAATTGCCTAGAAAG  
GAGCAGACGATATGGCGTCGCTCCCTGCAGGTCGACTCTAGAAACCAGCAGAGCATATGGGCTCGCTGGCTGCAG  
TATCCCGGGTTCATTAGATCCTAAGGTACCTAATTGCCTAGAAAGGAGCAGACGATATGGCGTCGCTCCCTGCAG  
GTCGACTCTAGAAACCAGCAGAGCATATGGGCTCGCTGGCTGCAGTATCCCGGGTTCATTAGATCCTAAGGTACC  
TAATTGCCTAGAAAGGAGCAGACGATATGGCGTCGCTCCCTGCAGGTCGACTCTAGAAACCAGCAGAGCATATGG  
GCTCGCTGGCTGCAGTATCCCGGGTTCATTAGATCCTAAGGTACCTAATTGCCTAGAAAGGAGCAGACGATATG  
GCGTCGCTCCCTGCAGGTCGACTCTAGAAACCAGCAGAGCATATGGGCTCGCTGGCTGCAGTATCCCGGGTTCAT  
TAGATCCTAAGGTACCTAATTGCCTAGAAAGGAGCAGACGATATGGCGTCGCTCCCTGCAGGTCGACTCTAGAAA  
CCAGCAGAGCATATGGGCTCGCTGGCTGCAGTATCCCGGGTTCATTAGATC

Xbp1 reporter

ATGGGCGCCATCATACACGCGGCCGAATCATcggtccgGGTGGATCTGGAGGTGGAGGTTCTGGAGGAGAAGAA  
CTTTTGGAGCAAGAATTATCATCTTGAGAACGAAGTGGCTCGTCTTAAGAAAGGTTCTGGCAGTGGAGAAGAAGTCTG  
CTTTCAAAGAATTACCACCTGGAAAATGAGGTAGCTAGACTGAAAAAGGGGAGCGGAAGTGGGGAGGAGTTGCT  
GAGCAAAAATTATCATTTGGAGAACGAAGTAGCACGACTAAAGAAAGGGTCCGGATCGGGTGAGGAGTTACTCT  
CGAAAAATTATCATCTCGAAAACGAAGTGGCTCGGCTAAAAAGGGCAGTGGTTCTGGAGAAGAGCTATTATCTA  
AAAACCTACCACCTCGAAAATGAGGTGGCACGCTTAAAAAGGGAAAGTGGCAGTGGTGAAGAGCTACTATCCAAG  
AATTATCATCTTGAGAACGAGGTAGCGCTTTGAAGAAGGGTCCGGCTCAGGAGAGGAACTGCTCTCGAAGAAC  
TATCATCTTGAAGAATGAGGTGCTCGATTAAAAAGGGATCGGGCAGTGGTGAGGAACTACTTTCAAAGAATTAC



CACCTCGAAAACGAAGTAGCTCGATTAAAGAAAGGTTCAAGGTCGGGTGAAGAATTACTGAGTAAAAATTATCAT  
CTGGAAAATGAGGTAGCGAGACTAAAAAAGGGGAGTGGTTCTGGCGAAGAGTTGCTATCGAAAAATTATCATCTT  
GAGAACGAAGTTGCTAGGCTCAAAAAGGGCTCAGGCTCAGGCGAGGAGTTGCTCTCGAAAACTACCACTTGGA  
AAATGAGGTCGCGAGGTTGAAAAAGGGGAGCGGGTCGGGCGAGGAGTTATTGAGCAAAAATCATTTAGAG  
AACGAAGTCGCGCGCTTAAAGAAAGGCTCGGGCTCGGGCGAAGAAGCTTATCGAAGAAGTACCACCTCGAAAAT  
GAGGTCGCCAGGTTGAAAAAGGGCAGTGGCAGCGGGGAGGAAGCTTGTAGCAAGAAGTACCACCTGGAGAATG  
AGGTCGCGAGATTGAAGAAAGGGTCGGGGAGCGGCGAGGAATTGCTCAGCAAGAATTATCATTTGGAGAACGA  
AGTCGCCAGGCTCAAGAAAGGCTCGGGTCGGGGGAGGAATTGTTGAGTAAAACTACCACTTGAAAAATGAAG  
TCGCCAGGCTCAAAAAGGGAGTGGGAGCGGCGAAGAGTTATTGAGCAAAAATTACCACTTGAGAGAACGAAGTG  
GCAAGGCTCAAGAAAGGGAGCGGCAGCGGGGAGGAGCTTATCGAAGAAGTACCACCTAGAGAATGAAGTCGC  
CCGCTTGAAGAAAGGCTCGGGGAGCGGGGAAGAGCTTTGAGCAAGAAGTACCACCTTGAAAAATGAGGTGGCGC  
GCTTGAAGAAAGGGAGCGGGAGCGGGGAAGAGTTACTATCTAAGAATTATCATCTCGAGAACGAGGTGGCTCGA  
CTAAGAAGGGCTCCGGCAGTGGGGAGGAAGTCTGTGCAAGAAGTATCATCTTGAAAAATGAGGTTGCAAGACTT  
AAAAAGGGGTCCGGATCAGGTGAGGAAGTACTCAGTAAGAATTACCACCTGGAAAACGAAGTTGCACGTTTAA  
GAAAGGATCAGGATCAGGCGAAGAAGTCTCTCAAAGATTATCATTTGGAAAATGAGGTTGCACGTTTAAAAAA  
GGGAAGTGGCAGTGGTGAGGAAGTCTGTGCAAAAATTATCATCTCGAGAATGAAGTAGCCGACTTAAAAAGG  
GTTCTGGCTCGGGTCAGCGCCGACCGGTGAGCAGTGGAGGACAGCACGCTGCAAGTAGTGGTACGGGTGCGG  
CCCCCACCCTCGGGAGCTGGACAGTCAGCGGCGGCCAGTGGTTCAGGTGGTGGACGAGCGGGTGTGGTGT  
TAACCCTGAGGAGCCGATGGAGGGTCCCTGGCTGAAATGGGGTGGCACCCATGATGGCCCCAAGAAGAAGG  
GCAAAGACCTGACGTTTGTCTTTGACCGGGTCTTTGGCGAGGCGGCCACCCAACAGGACGTGTTCCAGCACACCA  
CGCACAGCGTCTGGACAGCTTCTCCAGGGCTACAAGTCTCAGTGTTCCTACGGGGCCACCGGGGCTGGGA  
AGACACACACCATGCTGGGAAGGGAGGGGGACCCCGCATCATGTACCTGACCACCGTGGAACTGTACAGGCGC  
CTGGAGGCCCGCCAGCAGGAGAAGCACTTCGAGGTGCTCATCAGCTACCAGGAGGTGTATAATGAACAGATCCAT  
GACCTCCTGGAGCCCAAGGGGCCCTTGCATCCGCGAGGACCCGACAAGGGGGTGGTGGTGAAGGACTTTC  
TTCCACCAGCCAGCCTCAGCCGAGCAGCTGCTGGAGATACTGACCAGGGGGAACCGTAACCGCACGCAGCACCC  
CACTGATGCCAACGCGACTTCTCCCGCTCCCATGCCATCTTCCAGATCTTTGTGAAGCAGCAGGACCGGGTCCA  
GGACTGACCCAGGCTGTCCAGGTGGCCAAGATGAGCCTGATTGACCTGGCTGGCTCAGAGCGGGCATCCAGCAC  
CCATGCGAAGGGGGAGCGGCTGCGGGAGGGGGCCAACATCAACCGCTCTCTGCTGGCGCTCATCAACGTCTCA  
ATGCCTTGGCCGATGCAAAGGGCCGCAAGACCGCTGTGCCCTACGCGGACAGCGCACTGACCCGCTGCTCAAAG  
ACTCCCTCGGGGGCAACTGCCGCACAGTGTATGATCGCTGCCATCAGCCCCTCCAGCCTGACCTACGAGGACACGT  
ATAATACCCTCAAATATGCCGACCGGGCCAAGGAGATCAGGCTCTCGCTGAAGAGCAATGTGACCAGCCTGGACT  
GTCACATCAGCCAGTATGCTACCATCTGCCAACAGCTCCAGGCTGAGGTAGCCGCTCTGAGGAAGAAGCTCCAAG  
TGTATGAGGGGGGAGGCCAGCCCCACCACAGGACCTCCAGGATCTCCAAGTCGGGACCACCACCAGAACACC  
TTCCAGCTCCCCCTTGCACCCCACCCTCCAGCCAGCCCTGCACCCAGAGCTCCCTGCAGGGCCTAGAGCCCTT  
CAAGAGGAGAGTCTGGGGATGGAGGCCAGGTGGAGAGGGCCATGGAAGGGAACTCTTCAGACCAGGAGCAGT  
CCCCAGAGGATGAGGATGAAGGCCAGCTGAGGAGGTTCCAACCCAGATGCCAGAGCAGAACCCACACATGCA  
CTGCCAGAGTCCCCTCGCCTGACCCTGCAGCCCAAGCCAGTCGTGGGCCACTTCTCAGCACGGGAACTGGATGGG  
GACCGTTCTAAGCGGTTGGCCCTAAAGGTGCTGTGCGTTGCCAGCGGCAGTACTCCCTGCTCCAAGCAGCCAACC  
TCCTGACGCCCAGATGATCACAGAGTTTGAGACCCTACAGCAGCTGGTGAAGAGGAAAAAATTGAGCCTGGGG  
CAGAGGCCTTGAGGACTTCAGGCCTGGCCAGGGGGGCACCTCTGGCTCAGGAGCTGTGTTTCAAGTCAAAGCCTC  
CAGGATACTACTGGCCCTGTGACCCGACTATGGCGAGGCGACTGAGTGGCCCCCTGCACACCCTGGGAATCCCGC  
CTGGACCCAACTGCACCCAGCCAGGGGTCCCAGTGGCCATGGAGAAGAAGAGGAGGAGACCAAGCGCCTTG  
GAGGCAGACAGTCCCATGGCCCCAAAGCGGGGCACCAAGCGCCAGCGCCAGTCTTCTGCCCTGCCTAAGGAGA  
GGGTCTCTGCCTGACACCCAACCTTACAGGGGCCAGCACCCCAAGGAGAAAGGGCCTCCTCCCCCTGCCATT  
CCCCCTCGCTTTGCCAGCCACAGTCATCAAAGCCGGGTGCCCTGGGCCCTTCCGCCATGCAGAAGTCTCCAC  
CCCGCTGGCTCTGCCACTCGAGACCTCAATGCCACCTTTGATCTCTGAGGAGCCTCCCTCAAAGCCCAGTTTCC  
ATGAATGCATTGGCTGGGACAAAATACCCAGGAGCTGAGCAGGCTGGACCAGCCCTTCATCCCCAGGGCACCTG  
TGCCCTGTTACCATGAAGGGCCCCAAGCCAACATCTCCCTCCCTGGGACCTCTGCCTGCAAGAAGAAGCGCGT

TGCGAGTTCCTCAGTCTCCCATGGCCGCAGCCGCATCGCCCGCCTCCCCAGCAGCACTTTGAAGAGGCCAGCTGGG  
CCCCTTGACTCCCAGAGCTGCCCTTGAGTCCCCTGTGCCCTAGCAACCGGAGGAATGGAAAGGACCTCATCAGG  
GTGGGGAGAGCACTCTCAGCAGGGAACGGCGTCACCAAGGTGTCCGATAAGGACCCCGTGCCCTACCAACCTCCA  
TTCCTGTGTC AATGGGGCCGACATCAGCCAGCCTGGAAACCCTTGATGAATGGCGGCGGCGCCGCCAGCGCCAAA  
GCCATCTAA
